# Supplementary material for: Moth-eye Structured Polydimethylsiloxane Films for High-Efficiency Perovskite Solar Cells
Source: PubMed Central journal article supplement (PMC7770823; doi:10.1007/s40820-019-0284-y), 2019-06-25
Supplement: 40820_2019_284_MOESM1_ESM.pdf [file 40820_2019_284_MOESM1_ESM.pdf]

Supporting Information for

## Moth-eye Structured Polydimethylsiloxane Films for High-efficiency Perovskite Solar Cells

Min-cheol Kim<sup>1,2,#</sup>, Segeun Jang<sup>3,#</sup>, Jiwoo Choi<sup>1,2</sup>, Seong Min Kang<sup>4,\*</sup>, Mansoo Choi<sup>1,2,\*</sup>

<sup>1</sup>Global Frontier Center for Multiscale Energy Systems, Seoul National University, Seoul 151-744, Korea

<sup>2</sup>Department of Mechanical and Aerospace Engineering, Seoul National University, Seoul 151-744, Korea

<sup>3</sup>Department of Mechanical Engineering, Hanbat National University, Daejeon 34158, Korea

<sup>4</sup>Department of Mechanical Engineering, Chungnam National University, Daejeon 34134, Korea

#Min-cheol Kim and Segeun Jang contribute equally to this work

\*Corresponding authors. E-mail: smkang@cnu.ac.kr (Seong Min Kang); mchoi@snu.ac.kr (Mansoo Choi)

### Supplementary Figures

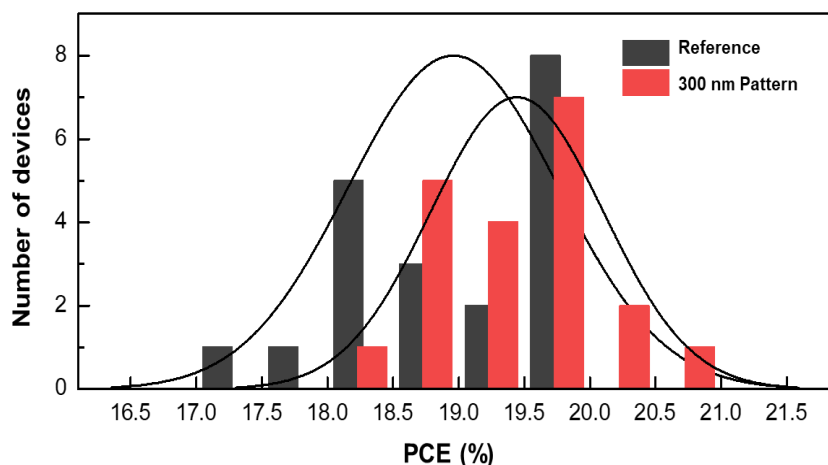

**Fig. S1** The PCE distribution histogram of the perovskite solar cell with and without moth-eye PDMS pads for 20 devices

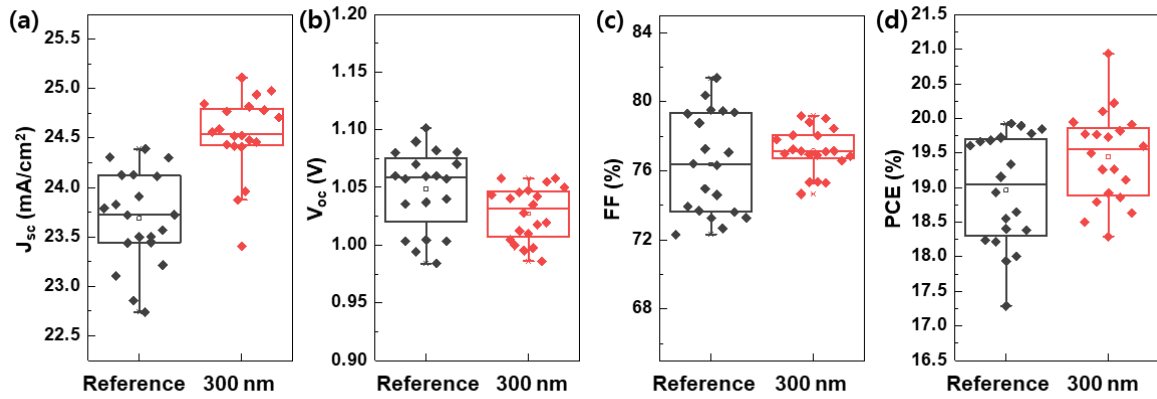

**Fig. S2** Photovoltaic parameters (**a**  $J_{sc}$ , **b**  $V_{oc}$ , **c** FF, **d** PCE) distribution box chart of the perovskite solar cell with and without moth-eye PDMS pads for 20 devices

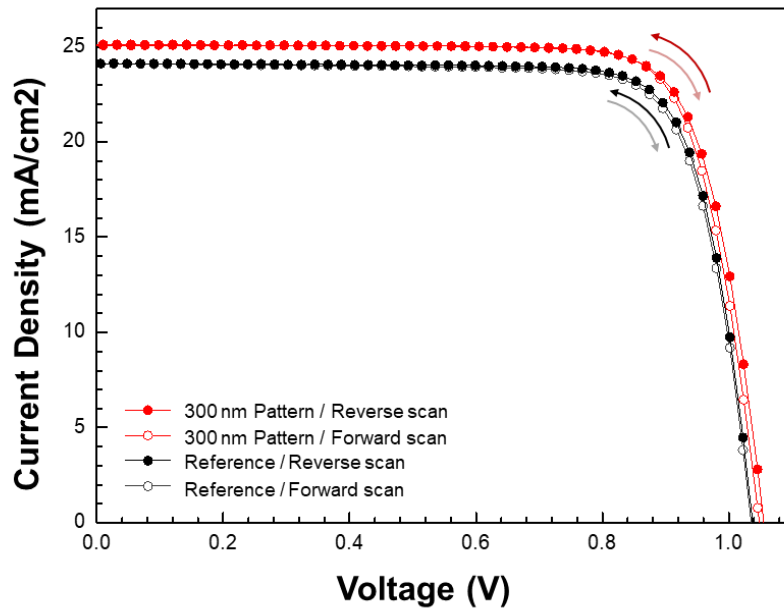

**Fig. S3** Comparison of hysteresis behavior for the perovskite solar cell with and without moth-eye PDMS pads by measuring reverse and forward scan of  $J$ - $V$  curves
